# Supplementary material
Source: PubMed Central journal article supplement (PMC7606689)
Supplement: supp_RA120.014263_160708_2_supp_585541_qfhzbn.pdf [file supp_RA120.014263_160708_2_supp_585541_qfhzbn.pdf]

**Supporting Information for**

**Biochemical insight into redox regulation of plastidial 3-phosphoglycerate dehydrogenase  
from *Arabidopsis thaliana***

Keisuke Yoshida<sup>1\*</sup>, Kinuka Ohtaka<sup>2,3</sup>, Masami Yokota Hirai<sup>2</sup>, Toru Hisabori<sup>1\*</sup>

<sup>1</sup>Laboratory for Chemistry and Life Science, Institute of Innovative Research, Tokyo Institute of  
Technology, Yokohama, Japan

<sup>2</sup>RIKEN Center for Sustainable Resource Science, Yokohama, Japan

<sup>3</sup>Department of Chemical and Biological Sciences, Faculty of Science, Japan Women's  
University, Tokyo, Japan

\*Corresponding author: Keisuke Yoshida and Toru Hisabori

Email: [yoshida.k.ao@m.titech.ac.jp](mailto:yoshida.k.ao@m.titech.ac.jp) (K.Y.); [thisabor@res.titech.ac.jp](mailto:thisabor@res.titech.ac.jp) (T.H.)

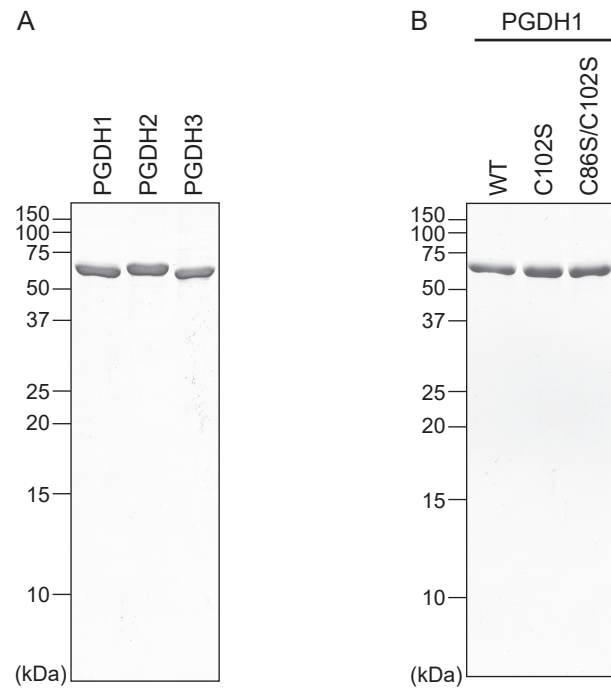

**Figure S1.** The SDS-PAGE profiles of *Arabidopsis* PGDH used in this study. Equal amounts of the proteins (1  $\mu$ g each) were loaded into each lane. (A) PGDH1, PGDH2, and PGDH3. (B) PGDH1 wild type (WT) and Cys-substituted mutants (C102S and C86S/C102S).

| Organism           | Accession    | Sequence                      |
|--------------------|--------------|-------------------------------|
| A. thaliana        | PGDH1        | -----MSA TAAASSIAV ATR-----   |
|                    | PGDH2        | -----MAF SSSSCSVAV NSWTSPPSPS |
| O. sativa          | XP_015650533 | -----MAF SSSSCSVAV NSWTSPPSPS |
|                    | XP_015634449 | -----MAF SSSSCSVAV NSWTSPPSPS |
| N. tabacum         | XP_016448968 | -----MAF SSSSCSVAV NSWTSPPSPS |
|                    | XP_016445835 | -----MAF SSSSCSVAV NSWTSPPSPS |
| S. oleracea        | XP_021860405 | -----MAF SSSSCSVAV NSWTSPPSPS |
|                    | XP_021839839 | -----MAF SSSSCSVAV NSWTSPPSPS |
| P. trichocarpa     | XP_002313870 | -----MAF SSSSCSVAV NSWTSPPSPS |
|                    | XP_024381540 | -----MAF SSSSCSVAV NSWTSPPSPS |
| P. patens          | XP_024389046 | -----MAF SSSSCSVAV NSWTSPPSPS |
|                    | XP_024381029 | -----MAF SSSSCSVAV NSWTSPPSPS |
| M. polymorpha      | XP_024377615 | -----MAF SSSSCSVAV NSWTSPPSPS |
|                    | XP_024381029 | -----MAF SSSSCSVAV NSWTSPPSPS |
| V. carteri         | XP_002950373 | -----MAF SSSSCSVAV NSWTSPPSPS |
|                    | XP_001694402 | -----MAF SSSSCSVAV NSWTSPPSPS |
| C. reinhardtii     | XP_001694402 | -----MAF SSSSCSVAV NSWTSPPSPS |
|                    | XP_001694402 | -----MAF SSSSCSVAV NSWTSPPSPS |
| Anabaena 7108      | XP_001694402 | -----MAF SSSSCSVAV NSWTSPPSPS |
|                    | XP_001694402 | -----MAF SSSSCSVAV NSWTSPPSPS |
| S. elongatus 7942  | XP_001694402 | -----MAF SSSSCSVAV NSWTSPPSPS |
|                    | XP_001694402 | -----MAF SSSSCSVAV NSWTSPPSPS |
| Synechocystis 6803 | XP_001694402 | -----MAF SSSSCSVAV NSWTSPPSPS |
|                    | XP_001694402 | -----MAF SSSSCSVAV NSWTSPPSPS |
| A. thaliana        | PGDH1        | -----MSA TAAASSIAV ATR-----   |
|                    | PGDH2        | -----MAF SSSSCSVAV NSWTSPPSPS |
| O. sativa          | XP_015650533 | -----MAF SSSSCSVAV NSWTSPPSPS |
|                    | XP_015634449 | -----MAF SSSSCSVAV NSWTSPPSPS |
| N. tabacum         | XP_016448968 | -----MAF SSSSCSVAV NSWTSPPSPS |
|                    | XP_016445835 | -----MAF SSSSCSVAV NSWTSPPSPS |
| S. oleracea        | XP_021860405 | -----MAF SSSSCSVAV NSWTSPPSPS |
|                    | XP_021839839 | -----MAF SSSSCSVAV NSWTSPPSPS |
| P. trichocarpa     | XP_002313870 | -----MAF SSSSCSVAV NSWTSPPSPS |
|                    | XP_024381540 | -----MAF SSSSCSVAV NSWTSPPSPS |
| P. patens          | XP_024389046 | -----MAF SSSSCSVAV NSWTSPPSPS |
|                    | XP_024381029 | -----MAF SSSSCSVAV NSWTSPPSPS |
| M. polymorpha      | XP_024377615 | -----MAF SSSSCSVAV NSWTSPPSPS |
|                    | XP_024381029 | -----MAF SSSSCSVAV NSWTSPPSPS |
| V. carteri         | XP_002950373 | -----MAF SSSSCSVAV NSWTSPPSPS |
|                    | XP_001694402 | -----MAF SSSSCSVAV NSWTSPPSPS |
| C. reinhardtii     | XP_001694402 | -----MAF SSSSCSVAV NSWTSPPSPS |
|                    | XP_001694402 | -----MAF SSSSCSVAV NSWTSPPSPS |
| Anabaena 7108      | XP_001694402 | -----MAF SSSSCSVAV NSWTSPPSPS |
|                    | XP_001694402 | -----MAF SSSSCSVAV NSWTSPPSPS |
| S. elongatus 7942  | XP_001694402 | -----MAF SSSSCSVAV NSWTSPPSPS |
|                    | XP_001694402 | -----MAF SSSSCSVAV NSWTSPPSPS |
| Synechocystis 6803 | XP_001694402 | -----MAF SSSSCSVAV NSWTSPPSPS |
|                    | XP_001694402 | -----MAF SSSSCSVAV NSWTSPPSPS |
| A. thaliana        | PGDH1        | -----MSA TAAASSIAV ATR-----   |
|                    | PGDH2        | -----MAF SSSSCSVAV NSWTSPPSPS |
| O. sativa          | XP_015650533 | -----MAF SSSSCSVAV NSWTSPPSPS |
|                    | XP_015634449 | -----MAF SSSSCSVAV NSWTSPPSPS |
| N. tabacum         | XP_016448968 | -----MAF SSSSCSVAV NSWTSPPSPS |
|                    | XP_016445835 | -----MAF SSSSCSVAV NSWTSPPSPS |
| S. oleracea        | XP_021860405 | -----MAF SSSSCSVAV NSWTSPPSPS |
|                    | XP_021839839 | -----MAF SSSSCSVAV NSWTSPPSPS |
| P. trichocarpa     | XP_002313870 | -----MAF SSSSCSVAV NSWTSPPSPS |
|                    | XP_024381540 | -----MAF SSSSCSVAV NSWTSPPSPS |
| P. patens          | XP_024389046 | -----MAF SSSSCSVAV NSWTSPPSPS |
|                    | XP_024381029 | -----MAF SSSSCSVAV NSWTSPPSPS |
| M. polymorpha      | XP_024377615 | -----MAF SSSSCSVAV NSWTSPPSPS |
|                    | XP_024381029 | -----MAF SSSSCSVAV NSWTSPPSPS |
| V. carteri         | XP_002950373 | -----MAF SSSSCSVAV NSWTSPPSPS |
|                    | XP_001694402 | -----MAF SSSSCSVAV NSWTSPPSPS |
| C. reinhardtii     | XP_001694402 | -----MAF SSSSCSVAV NSWTSPPSPS |
|                    | XP_001694402 | -----MAF SSSSCSVAV NSWTSPPSPS |
| Anabaena 7108      | XP_001694402 | -----MAF SSSSCSVAV NSWTSPPSPS |
|                    | XP_001694402 | -----MAF SSSSCSVAV NSWTSPPSPS |
| S. elongatus 7942  | XP_001694402 | -----MAF SSSSCSVAV NSWTSPPSPS |
|                    | XP_001694402 | -----MAF SSSSCSVAV NSWTSPPSPS |
| Synechocystis 6803 | XP_001694402 | -----MAF SSSSCSVAV NSWTSPPSPS |
|                    | XP_001694402 | -----MAF SSSSCSVAV NSWTSPPSPS |
| A. thaliana        | PGDH1        | -----MSA TAAASSIAV ATR-----   |
|                    | PGDH2        | -----MAF SSSSCSVAV NSWTSPPSPS |
| O. sativa          | XP_015650533 | -----MAF SSSSCSVAV NSWTSPPSPS |
|                    | XP_015634449 | -----MAF SSSSCSVAV NSWTSPPSPS |
| N. tabacum         | XP_016448968 | -----MAF SSSSCSVAV NSWTSPPSPS |
|                    | XP_016445835 | -----MAF SSSSCSVAV NSWTSPPSPS |
| S. oleracea        | XP_021860405 | -----MAF SSSSCSVAV NSWTSPPSPS |
|                    | XP_021839839 | -----MAF SSSSCSVAV NSWTSPPSPS |
| P. trichocarpa     | XP_002313870 | -----MAF SSSSCSVAV NSWTSPPSPS |
|                    | XP_024381540 | -----MAF SSSSCSVAV NSWTSPPSPS |
| P. patens          | XP_024389046 | -----MAF SSSSCSVAV NSWTSPPSPS |
|                    | XP_024381029 | -----MAF SSSSCSVAV NSWTSPPSPS |
| M. polymorpha      | XP_024377615 | -----MAF SSSSCSVAV NSWTSPPSPS |
|                    | XP_024381029 | -----MAF SSSSCSVAV NSWTSPPSPS |
| V. carteri         | XP_002950373 | -----MAF SSSSCSVAV NSWTSPPSPS |
|                    | XP_001694402 | -----MAF SSSSCSVAV NSWTSPPSPS |
| C. reinhardtii     | XP_001694402 | -----MAF SSSSCSVAV NSWTSPPSPS |
|                    | XP_001694402 | -----MAF SSSSCSVAV NSWTSPPSPS |
| Anabaena 7108      | XP_001694402 | -----MAF SSSSCSVAV NSWTSPPSPS |
|                    | XP_001694402 | -----MAF SSSSCSVAV NSWTSPPSPS |
| S. elongatus 7942  | XP_001694402 | -----MAF SSSSCSVAV NSWTSPPSPS |
|                    | XP_001694402 | -----MAF SSSSCSVAV NSWTSPPSPS |
| Synechocystis 6803 | XP_001694402 | -----MAF SSSSCSVAV NSWTSPPSPS |
|                    | XP_001694402 | -----MAF SSSSCSVAV NSWTSPPSPS |
| A. thaliana        | PGDH1        | -----MSA TAAASSIAV ATR-----   |
|                    | PGDH2        | -----MAF SSSSCSVAV NSWTSPPSPS |
| O. sativa          | XP_015650533 | -----MAF SSSSCSVAV NSWTSPPSPS |
|                    | XP_015634449 | -----MAF SSSSCSVAV NSWTSPPSPS |
| N. tabacum         | XP_016448968 | -----MAF SSSSCSVAV NSWTSPPSPS |
|                    | XP_016445835 | -----MAF SSSSCSVAV NSWTSPPSPS |
| S. oleracea        | XP_021860405 | -----MAF SSSSCSVAV NSWTSPPSPS |
|                    | XP_021839839 | -----MAF SSSSCSVAV NSWTSPPSPS |
| P. trichocarpa     | XP_002313870 | -----MAF SSSSCSVAV NSWTSPPSPS |
|                    | XP_024381540 | -----MAF SSSSCSVAV NSWTSPPSPS |
| P. patens          | XP_024389046 | -----MAF SSSSCSVAV NSWTSPPSPS |
|                    | XP_024381029 | -----MAF SSSSCSVAV NSWTSPPSPS |
| M. polymorpha      | XP_024377615 | -----MAF SSSSCSVAV NSWTSPPSPS |
|                    | XP_024381029 | -----MAF SSSSCSVAV NSWTSPPSPS |
| V. carteri         | XP_002950373 | -----MAF SSSSCSVAV NSWTSPPSPS |
|                    | XP_001694402 | -----MAF SSSSCSVAV NSWTSPPSPS |
| C. reinhardtii     | XP_001694402 | -----MAF SSSSCSVAV NSWTSPPSPS |
|                    | XP_001694402 | -----MAF SSSSCSVAV NSWTSPPSPS |
| Anabaena 7108      | XP_001694402 | -----MAF SSSSCSVAV NSWTSPPSPS |
|                    | XP_001694402 | -----MAF SSSSCSVAV NSWTSPPSPS |
| S. elongatus 7942  | XP_001694402 | -----MAF SSSSCSVAV NSWTSPPSPS |
|                    | XP_001694402 | -----MAF SSSSCSVAV NSWTSPPSPS |
| Synechocystis 6803 | XP_001694402 | -----MAF SSSSCSVAV NSWTSPPSPS |
|                    | XP_001694402 | -----MAF SSSSCSVAV NSWTSPPSPS |

**Figure S2.** Alignment of PGDH amino acid sequences in photosynthetic organisms. PGDH from *Arabidopsis thaliana*, *Oryza sativa*, *Nicotiana tabacum*, *Spinacia oleracea*, *Populus trichocarpa*, *Physcomitrella patens*, *Marchantia polymorpha*, *Volvox carteri*, *Chlamydomonas reinhardtii*, *Anabaena* sp. PCC 7108, *Synechococcus elongatus* sp. PCC 7942, and *Synechocystis* sp. PCC 6803 are shown. An arrow indicates the predicted cleaved site of the transit peptide. Asterisks indicate the redox-active Cys residues revealed in this study.

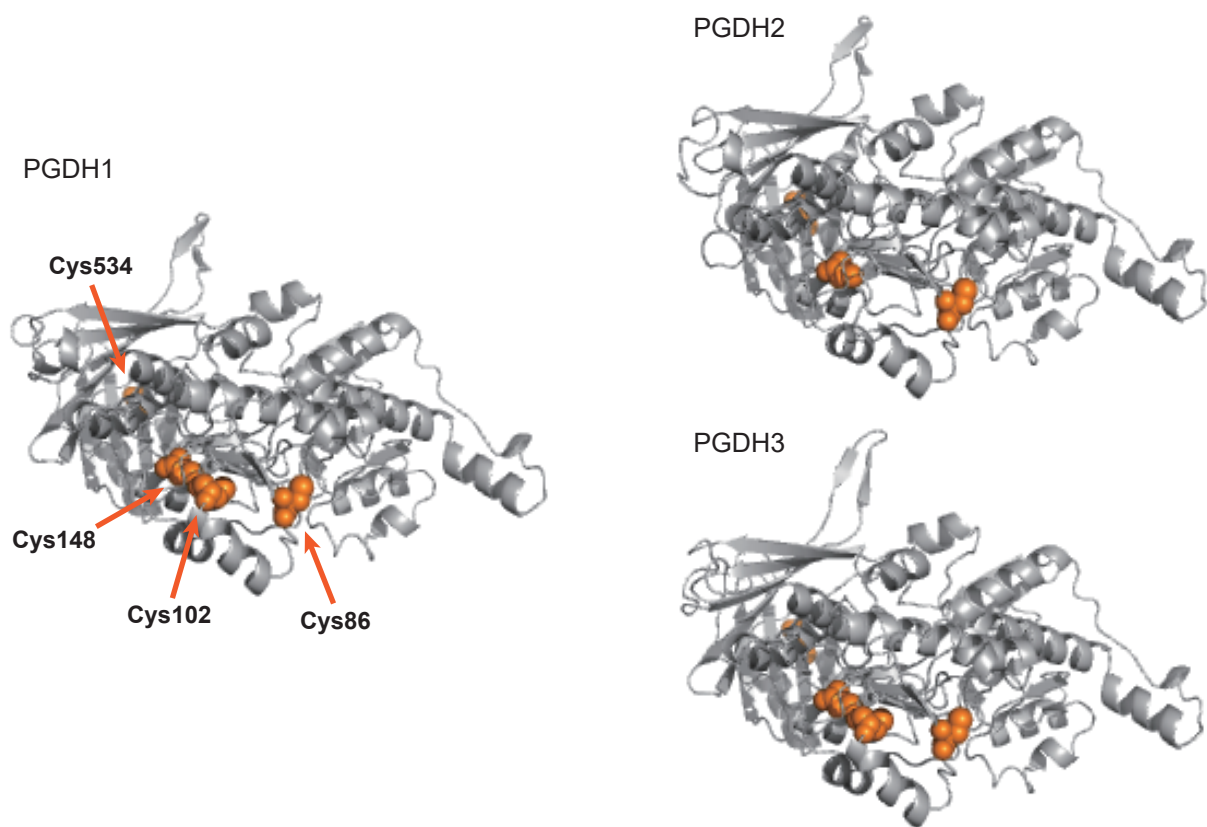

**Figure S3.** Three-dimensional structure model of *Arabidopsis* PGDH. The model was obtained as a homotetrameric form, but one chain is shown. For PGDH1, four Cys residues are shown by the orange spheres. For PGDH2 and PGDH3, only Cys residues common to PGDH1 are shown in the same way.

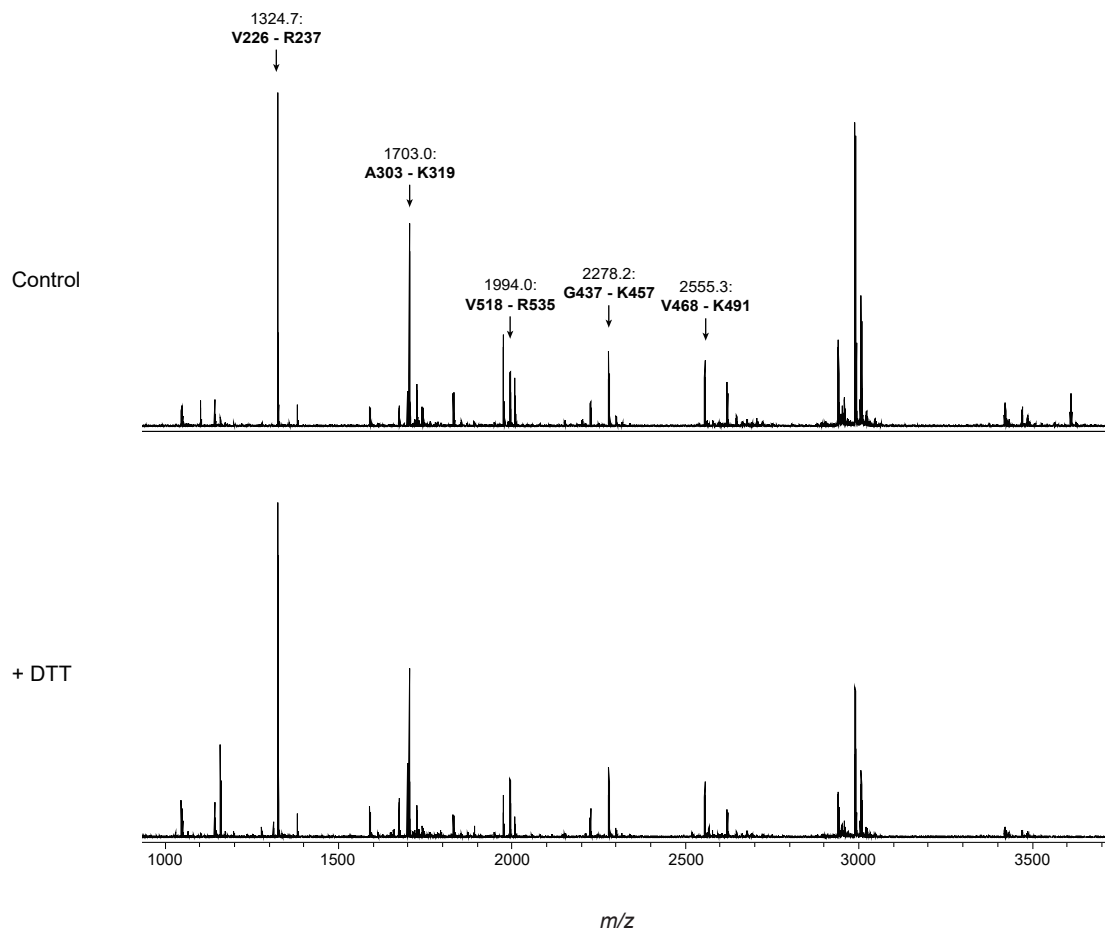

**Figure S4.** Overall mass spectra of PGDH1 tryptic peptides. Before the Cys alkylation and following in-gel digestion with trypsin, the protein sample was incubated in the absence (control) or presence of 10 mM DTT. The masses of several major peaks are shown with the corresponding peptides.

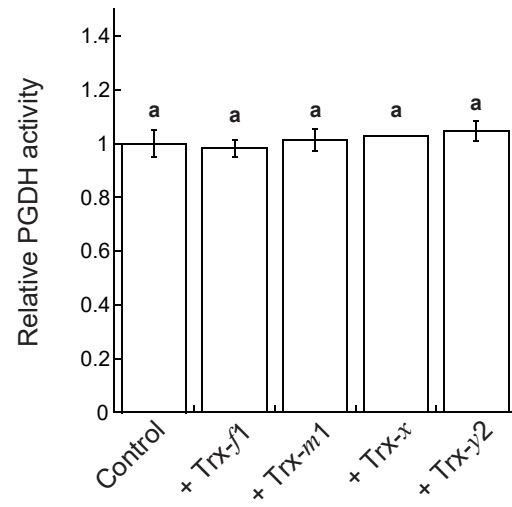

**Figure S5.** Enzyme activity measurement of PGDH1. PGDH1 (1.2  $\mu\text{M}$ ) was incubated with Trx-f1, Trx-m1, Trx-x, or Trx-y2 (0.1  $\mu\text{M}$  each) in the absence of DTT for 30 min. PGDH1 activity was then monitored. Each activity is expressed as the relative value. Data are shown as the mean  $\pm$  SD ( $n = 3-4$ ). Statistical analyses were performed using the Tukey-Kramer multiple comparison test, but significant difference was not observed (denoted as same letters,  $P > 0.05$ ).

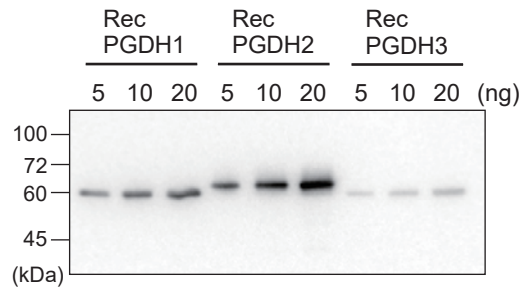

**Figure S6.** Specificity of PGDH antibody. The indicated amount of recombinant PGDH1, PGDH2, or PGDH3 protein was subjected to SDS-PAGE, followed by immunoblotting analysis using a PGDH antibody.
